# Supplementary material
Source: publisher figshare collection journal article supplement (https://karger.figshare.com/ndownloader/files/13627907)
Supplement: Supplementary file 1 [file 13627907]

## Supplementary Material

# The Designer Antimicrobial Peptide $\alpha$ -hBd-2 Facilitates Skin Wound Healing by Stimulating Keratinocyte Migration and Proliferation

Bobin Mi<sup>a,b</sup> Jing Liu<sup>a</sup> Yi Liu<sup>a</sup> Liangcong Hu<sup>a</sup> Yukun Liu<sup>b,c</sup> Adriana C. Panayi<sup>b</sup> Wu Zhou<sup>a</sup>  
Guohui Liu<sup>a</sup>

<sup>a</sup>Department of Orthopaedics, Union Hospital, Tongji Medical College, Huazhong University of Science and Technology, Wuhan, China, <sup>b</sup>Division of Plastic Surgery, Brigham and Women's Hospital, Harvard Medical School, Boston, USA, <sup>c</sup>Department of Plastic Surgery, Union Hospital, Tongji Medical College, Huazhong University of Science and Technology, Wuhan, China

# Supplementary Figure S1

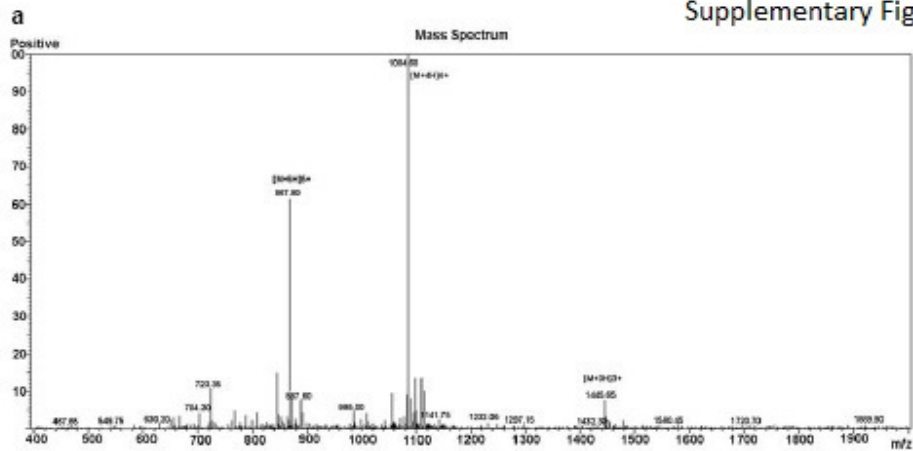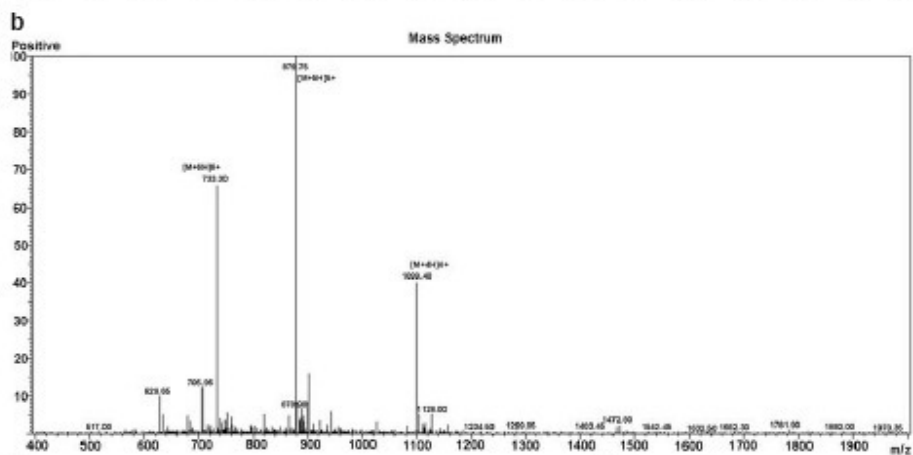

**c**

Sample Description:  
 Structure: APKAMVTCLKSGAICHVPFCPRRYKQIGTGGLPGTKCKKPK  
 Number: 020046  
 Lot No. P170804-WJ000140  
 Column: 4.6mm\*250mm, Inertsil ODS-SP  
 Solvent A: 0.1% Trifluoroacetic in 100% Acetonitrile  
 Solvent B: 0.1% Trifluoroacetic in 300% Water  
 Gradient:

|          | A    | B   |
|----------|------|-----|
| 0.01min  | 18%  | 82% |
| 25.00min | 43%  | 57% |
| 25.01min | 100% | 0%  |
| 30.00min | Stop |     |

Flow rate: 1.0ml/min  
 Wavelength: 220nm  
 Volume: 10µl

**d**

Sample Description:  
 Structure: GIGDPVTLKSGAICHVPFCPRRYKQIGTCGLPGTKCKKPK  
 Number: 020046  
 Lot No. P170804-WJ000140  
 Column: 4.6mm\*250mm, Inertsil ODS-SP  
 Solvent A: 0.1% Trifluoroacetic in 100% Acetonitrile  
 Solvent B: 0.1% Trifluoroacetic in 300% Water  
 Gradient:

|          | A    | B   |
|----------|------|-----|
| 0.01min  | 18%  | 82% |
| 25.00min | 43%  | 57% |
| 25.01min | 100% | 0%  |
| 30.00min | Stop |     |

Flow rate: 1.0ml/min  
 Wavelength: 220nm  
 Volume: 10µl

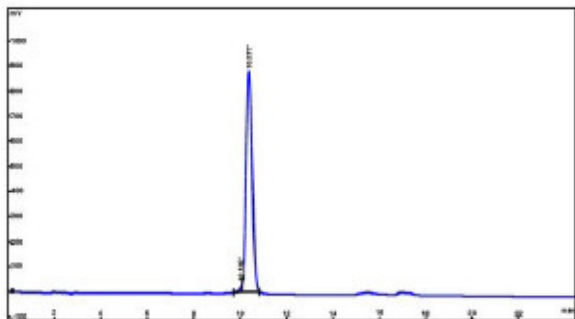

| Rank  | Time   | Conc.   | Area     | Height |
|-------|--------|---------|----------|--------|
| 1     | 10.102 | 1.6427  | 252546   | 37837  |
| 2     | 10.377 | 98.3573 | 15127563 | 878197 |
| Total |        | 100     | 15380209 | 916034 |

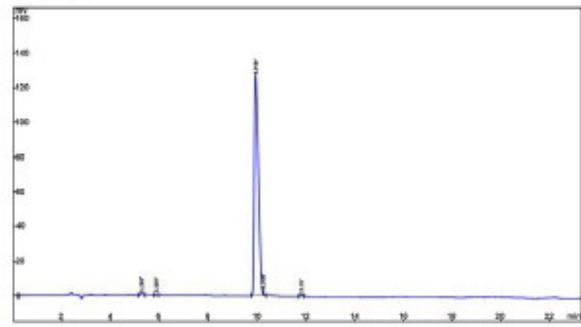

| Rank  | Time   | Conc.   | Area    | Height |
|-------|--------|---------|---------|--------|
| 1     | 5.268  | 0.6515  | 10270   | 1430   |
| 2     | 5.839  | 0.1357  | 2139    | 332    |
| 3     | 9.918  | 98.4531 | 1552015 | 128440 |
| 4     | 10.260 | 0.2660  | 4194    | 3041   |
| 5     | 11.796 | 0.4937  | 7783    | 3052   |
| Total |        | 100     | 1576401 | 132295 |
